# Supplementary material
Source: PubMed Central journal article supplement (PMC7976931)
Supplement: ntaa049_suppl_supplementary_materials.pdf [file ntaa049_suppl_supplementary_materials.pdf]

## Supplementary Materials

**Table 1.** Correlations Within Demand Indices and Between Alcohol and Cigarette Demand Indices

|                           | 1.           | 2.           | 3.           | 4.           | 5.           | 6.     | 7.     | 8.     | 9.     | 10.  |
|---------------------------|--------------|--------------|--------------|--------------|--------------|--------|--------|--------|--------|------|
| 1. APT – Intensity        | 1.00         |              |              |              |              |        |        |        |        |      |
| 2. APT – O <sub>max</sub> | .15**        | 1.00         |              |              |              |        |        |        |        |      |
| 3. APT – P <sub>max</sub> | -.01         | .89**        | 1.00         |              |              |        |        |        |        |      |
| 4. APT – Breakpoint       | .05          | .87**        | .91**        | 1.00         |              |        |        |        |        |      |
| 5. APT – Elasticity       | -.06         | -.84**       | -.68**       | -.72*        | 1.00         |        |        |        |        |      |
| 6. CPT – Intensity        | <b>.20**</b> |              |              |              |              | 1.00   |        |        |        |      |
| 7. CPT – O <sub>max</sub> |              | <b>.45**</b> |              |              |              | .42**  | 1.00   |        |        |      |
| 8. CPT – P <sub>max</sub> |              |              | <b>.36**</b> |              |              | -.04   | .62**  | 1.00   |        |      |
| 9. CPT – Breakpoint       |              |              |              | <b>.46**</b> |              | .21**  | .68**  | .59**  | 1.00   |      |
| 10. CPT – Elasticity      |              |              |              |              | <b>.18**</b> | -.38** | -.85** | -.59** | -.58** | 1.00 |

*Note:* Upper left triangle displays correlation coefficients within alcohol demand indices. Lower right triangle displays correlations coefficients within cigarette demand indices. Displayed in bold are correlation coefficients between pairing demand indices. All APT demand indices were log transformed for normality, and CPT – O<sub>max</sub>, Breakpoint, and Elasticity were log transformed.

\*  $p \leq .05$ , \*\*  $p \leq .01$

**Table 2.** Pattern Matrices for Principle Component Analysis of the Indices of Demand

|                  | <b>APT</b>  |           | <b>CPT</b>  |           |
|------------------|-------------|-----------|-------------|-----------|
|                  | Persistence | Amplitude | Persistence | Amplitude |
| Intensity        | .001        | .999      | .066        | .952      |
| O <sub>max</sub> | .964        | .091      | .854        | .274      |
| P <sub>max</sub> | .945        | -.086     | .907        | -.352     |
| Breakpoint       | .944        | -.020     | .827        | .001      |
| Elasticity       | -.864       | -.020     | -.813       | -.267     |

*Note:* A criterion of .40 was used to determine whether an index significantly loaded on a factor

**Table 3.** Hierarchical Regression Analysis Predicting Alcohol Demand Indices

|                     | R <sup>2</sup>  |                  |                  |                  |                  |                  |                |                  |                 |                  |
|---------------------|-----------------|------------------|------------------|------------------|------------------|------------------|----------------|------------------|-----------------|------------------|
|                     | Intensity       |                  | O <sub>max</sub> |                  | P <sub>max</sub> |                  | Breakpoint     |                  | Elasticity      |                  |
|                     | R <sup>2</sup>  | Δ R <sup>2</sup> | R <sup>2</sup>   | Δ R <sup>2</sup> | R <sup>2</sup>   | Δ R <sup>2</sup> | R <sup>2</sup> | Δ R <sup>2</sup> | R <sup>2</sup>  | Δ R <sup>2</sup> |
| Block 1             | .15             | .15              | --               | --               | --               | --               | --             | --               | --              | --               |
| Block 2             | .34             | .18              | .06              | .06              | .03              | .03              | .03            | .03              | .03             | .03              |
| Block 3             | --              | --               | .12              | .05              | .08              | .06              | .07            | .04              | .05             | .02              |
|                     | Coefficients    |                  |                  |                  |                  |                  |                |                  |                 |                  |
|                     | Intensity       |                  | O <sub>max</sub> |                  | P <sub>max</sub> |                  | Breakpoint     |                  | Elasticity      |                  |
|                     | <i>b</i>        | SE               | <i>b</i>         | SE               | <i>b</i>         | SE               | <i>b</i>       | SE               | <i>b</i>        | SE               |
| <u>Block 1</u>      |                 |                  |                  |                  |                  |                  |                |                  |                 |                  |
| Sex                 | <b>.09</b>      | <b>.03</b>       | --               | --               | --               | --               | --             | --               | --              | --               |
| Age                 | <b>&lt;-.01</b> | <b>&lt;.01</b>   | --               | --               | --               | --               | --             | --               | --              | --               |
| Education           | <b>&lt;-.01</b> | <b>&lt;.01</b>   | --               | --               | --               | --               | --             | --               | --              | --               |
| Emp. = Full-Time    | .04             | .04              | --               | --               | --               | --               | --             | --               | --              | --               |
| Emp. = Part-Time    | <.01            | .04              | --               | --               | --               | --               | --             | --               | --              | --               |
| Race = African Am.  | -.03            | .04              | --               | --               | --               | --               | --             | --               | --              | --               |
| Race = Asian        | .04             | .10              | --               | --               | --               | --               | --             | --               | --              | --               |
| Race = Latino/a     | .04             | .06              | --               | --               | --               | --               | --             | --               | --              | --               |
| Race = Native Am.   | -.05            | .14              | --               | --               | --               | --               | --             | --               | --              | --               |
| Race = Multi-Racial | <.01            | .04              | --               | --               | --               | --               | --             | --               | --              | --               |
| Income              | <b>&lt;-.01</b> | <b>&lt;.01</b>   | --               | --               | --               | --               | --             | --               | --              | --               |
| <u>Block 2</u>      |                 |                  |                  |                  |                  |                  |                |                  |                 |                  |
| ADS                 | <b>.01</b>      | <b>&lt;.01</b>   | .01              | <b>&lt;.01</b>   | <b>&lt;.01</b>   | <b>&lt;.01</b>   | <b>&lt;.01</b> | <b>&lt;.01</b>   | <b>&lt;-.01</b> | <b>&lt;.01</b>   |
| DPDD                | <b>.02</b>      | <b>&lt;.01</b>   | <b>.03</b>       | <b>&lt;.01</b>   | <b>.02</b>       | <b>&lt;.01</b>   | <b>.02</b>     | <b>&lt;.01</b>   | <b>&lt;-.01</b> | <b>&lt;.01</b>   |
| <u>Block 3</u>      |                 |                  |                  |                  |                  |                  |                |                  |                 |                  |
| FTND                | --              | --               | <b>.07</b>       | <b>.02</b>       | <b>.08</b>       | <b>.02</b>       | <b>.05</b>     | <b>.02</b>       | <b>-.04</b>     | <b>.02</b>       |
| CPSD                | --              | --               | <b>&lt;-.01</b>  | <b>&lt;.01</b>   | <b>&lt;-.01</b>  | <b>&lt;.01</b>   | <b>&lt;.01</b> | <b>&lt;.01</b>   | <b>&lt;.01</b>  | <b>&lt;.01</b>   |

*Abbreviations:* Emp. = Employment *Note:* Results presented are from reduced models excluding blocks that were not significant ('--' indicates non-significant block where block coefficients were not considered further). R<sup>2</sup> and R<sup>2</sup> change for each block are presented in the upper half of the table. Unstandardized regression coefficients and standard errors are presented in the lower half of the table. For the coefficients section, bold values indicate significance at  $p < .05$ .

**Table 4.** Hierarchical Regression Analysis Predicting Cigarette Demand Indices

|                     | R <sup>2</sup> |                  |                  |                  |                  |                  |                |                  |                 |                  |
|---------------------|----------------|------------------|------------------|------------------|------------------|------------------|----------------|------------------|-----------------|------------------|
|                     | Intensity      |                  | O <sub>max</sub> |                  | P <sub>max</sub> |                  | Breakpoint     |                  | Elasticity      |                  |
|                     | R <sup>2</sup> | Δ R <sup>2</sup> | R <sup>2</sup>   | Δ R <sup>2</sup> | R <sup>2</sup>   | Δ R <sup>2</sup> | R <sup>2</sup> | Δ R <sup>2</sup> | R <sup>2</sup>  | Δ R <sup>2</sup> |
| Block 1             | --             | --               | --               | --               | .07              | .07              | --             | --               | .08             | .08              |
| Block 2             | .31            | .31              | .16              | .16              | --               | --               | .02            | .02              | .23             | .15              |
| Block 3             | .33            | .02              | --               | --               | --               | --               | --             | --               | --              | --               |
|                     | Coefficients   |                  |                  |                  |                  |                  |                |                  |                 |                  |
|                     | Intensity      |                  | O <sub>max</sub> |                  | P <sub>max</sub> |                  | Breakpoint     |                  | Elasticity      |                  |
|                     | <i>b</i>       | SE               | <i>b</i>         | SE               | <i>B</i>         | SE               | <i>b</i>       | SE               | <i>b</i>        | SE               |
| <u>Block 1</u>      |                |                  |                  |                  |                  |                  |                |                  |                 |                  |
| Sex                 | --             | --               | --               | --               | .05              | .03              | --             | --               | <b>-.11</b>     | <b>.05</b>       |
| Age                 | --             | --               | --               | --               | <.01             | <.01             | --             | --               | <b>&lt;-.01</b> | <b>&lt;.01</b>   |
| Education           | --             | --               | --               | --               | <-.01            | <.01             | --             | --               | <.01            | <.01             |
| Emp. = Full-Time    | --             | --               | --               | --               | -.03             | .04              | --             | --               | -.04            | .06              |
| Emp. = Part-Time    | --             | --               | --               | --               | .03              | .04              | --             | --               | -.08            | .06              |
| Race = African Am.  | --             | --               | --               | --               | <b>-.07</b>      | <b>.04</b>       | --             | --               | <b>.15</b>      | <b>.06</b>       |
| Race = Asian        | --             | --               | --               | --               | -.14             | .09              | --             | --               | -.02            | .13              |
| Race = Latino/a     | --             | --               | --               | --               | <b>-.11</b>      | <b>.06</b>       | --             | --               | <b>.21</b>      | <b>.08</b>       |
| Race = Native Am.   | --             | --               | --               | --               | -.03             | .12              | --             | --               | -.11            | .18              |
| Race = Multi-Racial | --             | --               | --               | --               | -.02             | .04              | --             | --               | .06             | .06              |
| Income              | --             | --               | --               | --               | <b>.02</b>       | <b>&lt;.01</b>   | --             | --               | <b>-.03</b>     | <b>.01</b>       |
| <u>Block 2</u>      |                |                  |                  |                  |                  |                  |                |                  |                 |                  |
| FTND                | <b>.68</b>     | <b>.27</b>       | <b>.02</b>       | <b>.01</b>       | --               | --               | .02            | <.01             | <b>-.03</b>     | <b>&lt;.01</b>   |
| CPSD                | <b>.70</b>     | <b>.08</b>       | <b>.02</b>       | <b>&lt;.01</b>   | --               | --               | <.01           | <.01             | <b>-.02</b>     | <b>&lt;.01</b>   |
| <u>Block 3</u>      |                |                  |                  |                  |                  |                  |                |                  |                 |                  |
| ADS                 | <b>.15</b>     | <b>.07</b>       | --               | --               | --               | --               | --             | --               | --              | --               |
| DPDD                | .15            | .13              | --               | --               | --               | --               | --             | --               | --              | --               |

*Abbreviations:* Emp. = Employment *Note:* Results presented are from reduced models excluding blocks that were not significant ('—' indicates non-significant block where block coefficients were not considered further). R<sup>2</sup> and Δ R<sup>2</sup> change for each block are presented in the upper half of the table. Unstandardized regression coefficients and standard errors are presented in the lower half of the table. Breakpoint block 2 was trending (*p*=.06). For the coefficients section, bold values indicate significance at *p*<.05.
